# Supplementary material for: Glycoside hydrolase family 32 is present in Bacillus subtilis phages
Source: PubMed Central journal article supplement (PMC4595243; doi:10.1186/s12985-015-0373-6), 2015-10-06
Supplement: 12985_2015_373_MOESM1_ESM.pdf [file 12985_2015_373_MOESM1_ESM.pdf]

Arthrobacter\_Ureafaciens{395759459\_pdb\_4FFG}

Sequence alignment for Arthrobacter\_Ureafaciens{395759459\_pdb\_4FFG} showing domains beta1, beta2, and T... with amino acid sequences for various species.

Arthrobacter\_Ureafaciens{395759459\_pdb\_4FFG}

Sequence alignment for Arthrobacter\_Ureafaciens{395759459\_pdb\_4FFG} showing domains beta3, beta4, beta5, beta6, beta7, beta8, and alpha1 with amino acid sequences for various species.

Arthrobacter\_Ureafaciens{395759459\_pdb\_4FFG}

Sequence alignment for Arthrobacter\_Ureafaciens{395759459\_pdb\_4FFG} showing domains alpha2, beta9, beta10, beta11, beta12, beta13, beta14, and beta15 with amino acid sequences for various species.

Arthrobacter\_Ureafaciens{395759459\_pdb\_4FFG}

β16 β17 β18 310 β19 α3 β20 β21 β22 η5 β23 β24 β25
Arthrobacter\_Ureafaciens{395759459\_pdb\_4FFG}
Bacillus\_phage\_Sp10{418489513}
Bacillus\_phage\_phiN171{526118583}
Bacillus\_phage\_SPG24{635172126}
Clostridium\_arbusti{497923519}
Clostridium\_sp.\_Bc1{488769545}
Clostridium\_pasteurianum{489536387}
Sporolactobacillus\_laevolacticus{558633503}
Vibrio\_natriegens{520914094}
Arthrobacter\_globiformis{489895086}
Fusarium\_fujikuroi\_IMI\_58289{517323836}
Penicillium\_roqueforti{584415490}
Bacillus\_subtilis\_BSn5{321312996}
Clostridium\_arbusti{497923183}
Clostridium\_pasteurianum{489536342}
Aspergillus\_Awamori{58177588\_pdb\_1Y9M}
Aspergillus\_Ficum{392935477\_pdb\_3SC7}
Bombyx\_mori{512888185}
Manduca sexta{260765449}
Physcomitrella\_patens{168023292}
Cichorium\_Intybus{61679911\_pdb\_1ST8}

Arthrobacter\_Ureafaciens{395759459\_pdb\_4FFG}

β26 β27 TT β28 TT β29 η6 TT β30 TT β31 TT β32
Arthrobacter\_Ureafaciens{395759459\_pdb\_4FFG}
Bacillus\_phage\_Sp10{418489513}
Bacillus\_phage\_phiN171{526118583}
Bacillus\_phage\_SPG24{635172126}
Clostridium\_arbusti{497923519}
Clostridium\_sp.\_Bc1{488769545}
Clostridium\_pasteurianum{489536387}
Sporolactobacillus\_laevolacticus{558633503}
Vibrio\_natriegens{520914094}
Arthrobacter\_globiformis{489895086}
Fusarium\_fujikuroi\_IMI\_58289{517323836}
Penicillium\_roqueforti{584415490}
Bacillus\_subtilis\_BSn5{321312996}
Clostridium\_arbusti{497923183}
Clostridium\_pasteurianum{489536342}
Aspergillus\_Awamori{58177588\_pdb\_1Y9M}
Aspergillus\_Ficum{392935477\_pdb\_3SC7}
Bombyx\_mori{512888185}
Manduca sexta{260765449}
Physcomitrella\_patens{168023292}
Cichorium\_Intybus{61679911\_pdb\_1ST8}

Arthrobacter\_Ureafaciens{395759459\_pdb\_4FFG}

β33 TT β34 β35
Arthrobacter\_Ureafaciens{395759459\_pdb\_4FFG}
Bacillus\_phage\_Sp10{418489513}
Bacillus\_phage\_phiN171{526118583}
Bacillus\_phage\_SPG24{635172126}
Clostridium\_arbusti{497923519}
Clostridium\_sp.\_Bc1{488769545}
Clostridium\_pasteurianum{489536387}
Sporolactobacillus\_laevolacticus{558633503}
Vibrio\_natriegens{520914094}
Arthrobacter\_globiformis{489895086}
Fusarium\_fujikuroi\_IMI\_58289{517323836}
Penicillium\_roqueforti{584415490}
Bacillus\_subtilis\_BSn5{321312996}
Clostridium\_arbusti{497923183}
Clostridium\_pasteurianum{489536342}
Aspergillus\_Awamori{58177588\_pdb\_1Y9M}
Aspergillus\_Ficum{392935477\_pdb\_3SC7}
Bombyx\_mori{512888185}
Manduca sexta{260765449}
Physcomitrella\_patens{168023292}
Cichorium\_Intybus{61679911\_pdb\_1ST8}
